# Supplementary material for: Novel Insect Leaf-Mining after the End-Cretaceous Extinction and the Demise of Cretaceous Leaf Miners, Great Plains, USA
Source: PLoS One. 2014 Jul 24;9(7):e103542. doi: 10.1371/journal.pone.0103542 (PMC4110055; doi:10.1371/journal.pone.0103542)
Supplement: Table S2 — Mexican Hat damage types by host plant. (XLSX) [file pone.0103542.s002.xlsx]

## Sheet: Sheet1
Table S2. Mexican Hat damage types by host plant.
	Platanus raynoldsii	Juglandiphyllites glabra	Zizyphoides flabella	Cercidiphyllum genetrix	Lauraceae sp. 2	"Populus" nebrascensis	Browniea serrata	"Ficus" artocarpoides	Lauraceae sp. 1	cf. Ternstroemites aureavallis	Dicot morphotype 1	Dicot morphotype 2	Dicot morphotype 3	Dicot morphotype 4
Hole Feeding
DT01	X	X	X	X	X	X	X
DT02	X	X	X	X	X	X	X	X			X	X	X
DT03	X	X	X	X	X		X	X
DT04	X	X				X					X
DT05	X	X	X		X			X
DT07			X		X
DT08	X	X			X		X
DT57						X
Margin Feeding
DT12	X	X	X	X	X						X	X
DT13					X
DT14														X
DT15	X		X	X	X		X				X
Skeletonization
DT16	X	X	X	X
DT17	X		X			X
DT19	X	X
DT21
DT23	X			X
DT56	X		X	X
Surface Feeding
DT25
DT29	X		X
DT30				X
Piercing and Sucking
DT46	X	X	X	X		X	X		X
DT48					X
DT281					X
Galling
DT11	X	X	X	X	X	X
DT32	X	X	X	X	X		X
DT33	X		X	X
DT34			X	X	X	X	X			X
Mining
DT36	X										X
DT37								X
DT41			X	X
DT42		X
DT91	X	X	X	X		X	X				X
DT92		X
DT104	X
DT105		X
DT282	X	X
