# Supplementary material for: Novel Insect Leaf-Mining after the End-Cretaceous Extinction and the Demise of Cretaceous Leaf Miners, Great Plains, USA
Source: PLoS One. 2014 Jul 24;9(7):e103542. doi: 10.1371/journal.pone.0103542 (PMC4110055; doi:10.1371/journal.pone.0103542)
Supplement: Table S3 — Leaf mines from local and regional Cretaceous and Paleocene localities. (XLSX) [file pone.0103542.s003.xlsx]

## Sheet: Sheet1
Table S3. Leaf mines from local and regional Cretaceous and Paleocene localities.
Repository	Specimen Number	Locality Number	Locality Name	State	Age	Host Identification	Mine Damage Type
YPM	8880	KRJ88131		North Dakota	Maastrichtian	"Celastrus" taurenensis	41
DMNH	YPM6336	KRJ87112		North Dakota	Maastrichtian	HC158	41
DMNH	18786	430	Old 87111	North Dakota	Maastrichtian	Cercidiphyllum ellipticum	45
DMNH	13007	571	Little Mound of Glee/Mosquito Butte	North Dakota	Maastrichtian	"Dryophyllum" subfalcatum	35
YPM	7128	572	Butte Base	North Dakota	Maastrichtian	"Dryophyllum" subfalcatum	35
DMNH	19468	2203	Somebody's Garden	North Dakota	Maastrichtian	Cercidiphyllum ellipticum	35
DMNH	19070	1491	Madelines Bank	North Dakota	Maastrichtian	Cercidiphyllum ellipticum	35
DMNH	19619	2203	Somebody's Garden	North Dakota	Maastrichtian	HC081	41
DMNH	19078	1491	Madelines Bank	North Dakota	Maastrichtian	Cercidiphyllum ellipticum	42
YPM	6367	567	Marijuana	North Dakota	Maastrichtian	HC080	43
DMNH	19360	567	Marijuana	North Dakota	Maastrichtian	Cercidiphyllum ellipticum	45
DMNH	19039	1491	Madelines Bank	North Dakota	Maastrichtian	Cercidiphyllum ellipticum	45
DMNH	19058	1491	Madelines Bank	North Dakota	Maastrichtian	Cercidiphyllum ellipticum	45
DMNH	19060	1491	Madelines Bank	North Dakota	Maastrichtian	Cercidiphyllum ellipticum	65
DMNH	19077	1491	Madelines Bank	North Dakota	Maastrichtian	Cercidiphyllum ellipticum	65
DMNH	6571	2095	Nowhere Hole	North Dakota	Maastrichtian	HC073	35
YPM	7908	565	Dragonfly	North Dakota	Maastrichtian	"Dryophyllum" subfalcatum	41
YPM	6372	568	Allison's Attachment	North Dakota	Maastrichtian	Erlingdorfia montana	35
YPM	6886	568	Allison's Attachment	North Dakota	Maastrichtian	Erlingdorfia montana	35
DMNH	YPM6150	568	Allison's Attachment	North Dakota	Maastrichtian	HC043	41
DMNH	20503	568	Allison's Attachment	North Dakota	Maastrichtian	HC034	41
DMNH	6258	568	Allison's Attachment	North Dakota	Maastrichtian	Erlingdorfia montana	43
DMNH	8398	568	Allison's Attachment	North Dakota	Maastrichtian	Erlingdorfia montana	45
DMNH	8406	568	Allison's Attachment	North Dakota	Maastrichtian	Erlingdorfia montana	45
DMNH	20493	568	Allison's Attachment	North Dakota	Maastrichtian	Erlingdorfia montana	65
DMNH	19981	2097	Terry's HCIIa site	North Dakota	Maastrichtian	"Dryophyllum" subfalcatum	41
DMNH	19984	2097	Terry's HCIIa site	North Dakota	Maastrichtian	HC032	42
DMNH	21000	2097	Terry's HCIIa site	North Dakota	Maastrichtian	"Dryophyllum" subfalcatum	45
DMNH	20857	1781	Dean's Hadrosaur	North Dakota	Maastrichtian	"Ficus" planicostata	41
DMNH	19254	1781	Dean's Hadrosaur	North Dakota	Maastrichtian	HC254	43
DMNH	19994	1781	Dean's Hadrosaur	North Dakota	Maastrichtian	HC254	43
DMNH	20005	1855	Triceps	North Dakota	Maastrichtian	"Artocarpus" lessigiana	41
DMNH	20000	1855	Triceps	North Dakota	Maastrichtian	Unidentifiable	41
DMNH	20792	517	Stan T-rex site	North Dakota	Maastrichtian	HC043	35
DMNH	20061	428	Mud Butte/Dean St.	North Dakota	Maastrichtian	Grewiopsis saportana	35
DMNH	13591	428	Mud Butte/Dean St.	North Dakota	Maastrichtian	"Ficus" planicostata	35
DMNH	13641	428	Mud Butte/Dean St.	North Dakota	Maastrichtian	HC199	41
DMNH	7544	428	Mud Butte/Dean St.	North Dakota	Maastrichtian	HC199	41
DMNH	20059	428	Mud Butte/Dean St.	North Dakota	Maastrichtian	HC199	41
DMNH	20070	428	Mud Butte/Dean St.	North Dakota	Maastrichtian	HC321	41
DMNH	7483	428	Mud Butte/Dean St.	North Dakota	Maastrichtian	HC321	41
DMNH	7567	428	Mud Butte/Dean St.	North Dakota	Maastrichtian	"Ficus" planicostata	41
DMNH	20351	428	Mud Butte/Dean St.	North Dakota	Maastrichtian	Unidentifiable	41
DMNH	7511	428	Mud Butte/Dean St.	North Dakota	Maastrichtian	Unidentifiable	41
DMNH	7498	428	Mud Butte/Dean St.	North Dakota	Maastrichtian	Marmarthia pearsonii	45
DMNH	7519	428	Mud Butte/Dean St.	North Dakota	Maastrichtian	Marmarthia pearsonii	45
DMNH	7396	428	Mud Butte/Dean St.	North Dakota	Maastrichtian	Marmarthia pearsonii	65
YPM	9017	KRJ87110		North Dakota	Maastrichtian	Marmarthia trivialis	40
YPM	8586	KRJ87110		North Dakota	Maastrichtian	HC003	41
YPM	6299	KRJ87110		North Dakota	Maastrichtian	HC168	109
DMNH	20013	439	Hwy. 16 HCIII	North Dakota	Maastrichtian	Grewiopsis saportana	42
DMNH	20015	2098	No Leaf Minors	North Dakota	Maastrichtian	HC266	41
DMNH	19873	2098	No Leaf Minors	North Dakota	Maastrichtian	HC324	41
DMNH	7257	900	Battleship	North Dakota	Maastrichtian	Grewiopsis saportana	35
DMNH	7188	900	Battleship	North Dakota	Maastrichtian	Grewiopsis saportana	35
DMNH	7224	900	Battleship	North Dakota	Maastrichtian	HC003	35
DMNH	7160	900	Battleship	North Dakota	Maastrichtian	"Dryophyllum" subfalcatum	41
DMNH	7716	900	Battleship	North Dakota	Maastrichtian	"Rhamnus" cleburni	41
DMNH	7317	900	Battleship	North Dakota	Maastrichtian	Liriodendrites bradacii	42
DMNH	20025	900	Battleship	North Dakota	Maastrichtian	HC329	42
DMNH	7249	900	Battleship	North Dakota	Maastrichtian	HC330	42
DMNH	20023	900	Battleship	North Dakota	Maastrichtian	Marmarthia trivialis	45
DMNH	20022	900	Battleship	North Dakota	Maastrichtian	Marmarthia pearsonii	45
YPM	7199	900	Battleship	North Dakota	Maastrichtian	Marmarthia pearsonii	45
DMNH	7228	900	Battleship	North Dakota	Maastrichtian	Marmarthia pearsonii	45
DMNH	7242	900	Battleship	North Dakota	Maastrichtian	Marmarthia pearsonii	45
DMNH	7263	900	Battleship	North Dakota	Maastrichtian	Marmarthia pearsonii	45
DMNH	7325	900	Battleship	North Dakota	Maastrichtian	Marmarthia pearsonii	45
DMNH	7610	900	Battleship	North Dakota	Maastrichtian	Marmarthia pearsonii	45
DMNH	7610	900	Battleship	North Dakota	Maastrichtian	Marmarthia pearsonii	45
DMNH	8705	900	Battleship	North Dakota	Maastrichtian	Marmarthia pearsonii	45
DMNH	7313	900	Battleship	North Dakota	Maastrichtian	Marmarthia pearsonii	45
DMNH	7598	900	Battleship	North Dakota	Maastrichtian	Marmarthia pearsonii	45
DMNH	7151	900	Battleship	North Dakota	Maastrichtian	Marmarthia pearsonii	45
DMNH	7313	900	Battleship	North Dakota	Maastrichtian	Marmarthia pearsonii	45
DMNH	7321	900	Battleship	North Dakota	Maastrichtian	Marmarthia pearsonii	45
DMNH	7264	900	Battleship	North Dakota	Maastrichtian	Marmarthia pearsonii	45
DMNH	7286	900	Battleship	North Dakota	Maastrichtian	HC265	59
DMNH	7605	900	Battleship	North Dakota	Maastrichtian	"Ficus" planicostata	65
DMNH	35834	4301	Skunk Hunt	Montana	Maastrichtian	Unidentified	41
DMNH	22598	427	Pyramid Butte	North Dakota	Danian	Cornophyllum newberryi	43
YPM	10782	KRJ86107	Pyramid Butte	North Dakota	Danian	FU007	60
DMNH	6413	427	Pyramid Butte	North Dakota	Danian	FU007	60
YPM	9762	KRJ86107	Pyramid Butte	North Dakota	Danian	"Populus" nebrascensis	282
YPM	9796	KRJ86107	Pyramid Butte	North Dakota	Danian	"Populus" nebrascensis	282
YPM	9636	KRJ86107		North Dakota	Danian	"Populus" nebrascensis	91
YPM	9781	KRJ86107	Pyramid Butte	North Dakota	Danian	Unidentifiable	91
DMNH	21857	562	Marmarth Ash	North Dakota	Danian	FU043	59
DMNH	22053	563	Paleocene Leaf	North Dakota	Danian	Paranymphaea crassifolia	59
YPM	9526	8403		North Dakota	Danian	Zizyphoides flabella	91
YPM	80065	DP0517		North Dakota	Danian	Browniea serrata	possible mine
YPM	80002	DP0517		North Dakota	Danian	Unidentifiable	possible mine
DMNH	35424	2944	Rich's Folly	Montana	Danian	Zizyphoides flabella	possible mine
USNM	597561	42042	Lur'd Leaves	Wyoming	Thanetian	Browniea serrata	41
USNM	560151	41694	Haz-Mat	Wyoming	Thanetian	Cercidiphyllum ellipticum	41
USNM	560152	41694	Haz-Mat	Wyoming	Thanetian	Cercidiphyllum ellipticum	41
USNM	560186	41694	Haz-Mat	Wyoming	Thanetian	Cercidiphyllum ellipticum	41
USNM	560187	42041	Skeleton Coast	Wyoming	Thanetian	Cercidiphyllum ellipticum	41
USNM	560188	42041	Skeleton Coast	Wyoming	Thanetian	Cercidiphyllum ellipticum	41
